# Supplementary material
Source: PubMed Central journal article supplement (PMC5610943)
Supplement: NIHMS901724-supplement.pdf [file NIHMS901724-supplement.pdf]

## Supplementary Material

### Novel Mechanism Evolved for Mycobacteria RNA polymerase and Topoisomerase I Protein-Protein Interaction

Srikanth Banda, Nan Cao, Yuk-Ching Tse-Dinh\*

\* Correspondence: Yuk-Ching Tse-Dinh: ytsedinh@fiu.edu

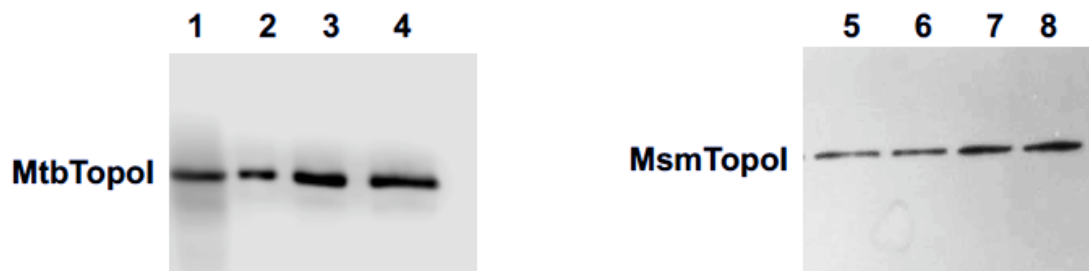

**Figure S1. Rabbit MtbTopoI polyclonal antibodies can cross-react with MsmTopoI.** Rabbit Polyclonal antibodies that were generated against MtbTopoI can cross-react with MsmTopoI due to a high sequence homology between these proteins. Western blotting of the soluble lysates from *M. smegmatis* mc<sup>2</sup> 155 was carried out to verify the cross-reactivity of the antibody. Lane 1: Soluble lysate (10  $\mu$ g) from *M. tuberculosis* H37Rv. Lane 2-4: Purified MtbTopoI (25 ng, 50 ng, 75 ng). Lane 5: Purified MsmTopoI (25 ng). Lane 6-8: Soluble lysates (10  $\mu$ g) of *M. smegmatis* mc<sup>2</sup> 155 over the course of its growth (Lane 6: OD<sub>600</sub>- 0.8, Lane 7: OD<sub>600</sub>- 1.5, Lane 8: OD<sub>600</sub>- 3.0).

|                                          | 1   | 2   | 3   | 4   | 5   | 6   | 7   | 8   |
|------------------------------------------|-----|-----|-----|-----|-----|-----|-----|-----|
| <i>M. smegmatis</i> RNAP $\beta'$ (15nM) | --- | --- | +   | +   | +   | --- | --- | --- |
| <i>M. smegmatis</i> RNAP $\beta$ (15nM)  | --- | --- | --- | --- | --- | +   | +   | +   |
| <i>E. coli</i> Topoisomerase I (nM)      | --- | 20  | 5   | 10  | 20  | 5   | 10  | 20  |
| <i>E. coli</i> Topoisomerase I (25ng)    | +   | --- | --- | --- | --- | --- | --- | --- |
| HisPur cobalt resin                      | --- | +   | +   | +   | +   | +   | +   | +   |

  

Topoisomerase I  
(~100kDa)

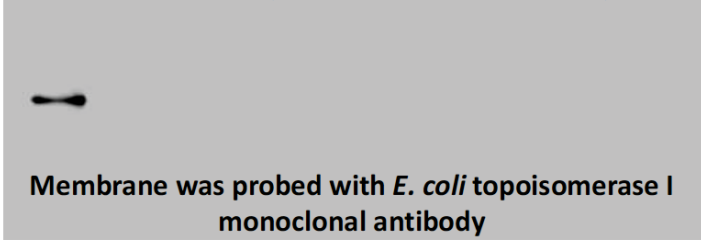

Membrane was probed with *E. coli* topoisomerase I monoclonal antibody

**Figure S2. Lack of inter-species cross-interactions between purified topoisomerase I, and RNA polymerase  $\beta$ ,  $\beta'$  subunits.** An assay was carried out to verify the lack of cross-interaction of the purified RNA polymerase  $\beta$ ,  $\beta'$  subunits of *M. smegmatis* with *E. coli* topoisomerase I. Recombinant (6xHis) RNA polymerase subunit of *M. smegmatis* was first incubated with the *E. coli* topoisomerase I, and later captured on the HisPur cobalt resin. The recombinant protein bound resin was washed in pull-down wash buffer (10 mM HEPES, pH: 7.5, 10 mM Imidazole, 0.005% Tween -20), and finally elutions were made with pull-down elution buffer (10 mM HEPES, pH: 7.5, 350 mM Imidazole). The eluates were analyzed by SDS-PAGE and Western blot with a monoclonal antibody against *E. coli* topoisomerase I. Lane 1: Purified *E. coli* topoisomerase I was loaded directly. Lane 2: Eluate from pull-down reaction of *E. coli* topoisomerase I alone. Lanes 3, 4, 5 are loaded with eluates from the pull-down reactions of recombinant His-tagged RNA polymerase  $\beta'$  subunit. Lanes 6, 7, 8 represent the eluates from the pull-down with recombinant His-tagged RNA polymerase  $\beta$ .

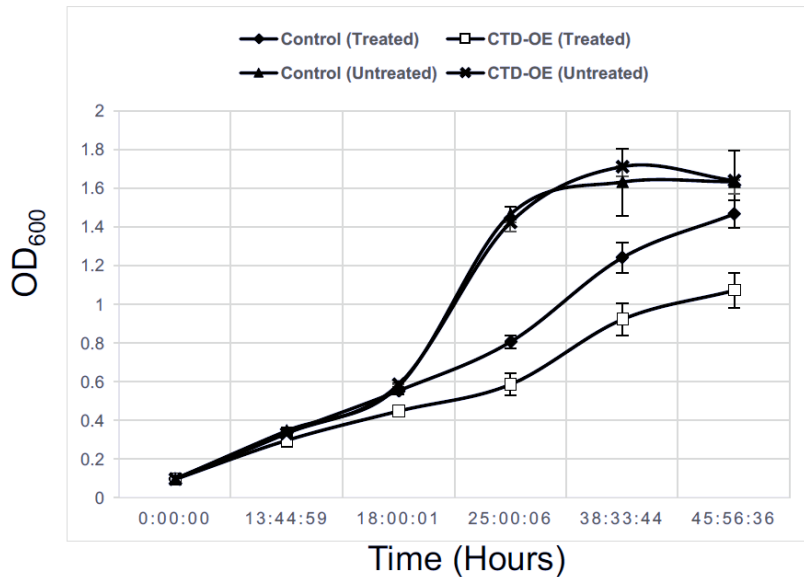

**Figure S3. Effect of MsmTopoI-CTD overexpression on growth:** The growth curves of the MsmTopoI-CTD overexpression strain and the control strain, induced with 25 ng/ml of tetracycline in 7H9 media, were monitored over a period of 48 hours by reading the absorbance (595 nm) at different time points. The overexpression of MsmTopoI-CTD did not influence the growth rate (Untreated curves). However, a slower growth rate of the MsmTopoI-CTD overexpression strain was observed in the presence of 0.15 $\mu$ M Moxifloxacin (Treated curves). Error bars represent the standard deviation (n=3).

|                                              |     |        |            |         |                         |      |
|----------------------------------------------|-----|--------|------------|---------|-------------------------|------|
| <i>Mycobacterium smegmatis</i> MC2 155       | 910 | R      | GPVKK[ 2 ] | PA      | KKAAKKAPAKKAAAKKA       | 936  |
| <i>Mycobacterium tuberculosis</i> H37Rv      | 911 | R      | GPAKR      | PA      | RKAARKVPAKKAARKD-       | 934  |
| <i>Mycobacterium leprae</i>                  | 915 | R      | GPVKR      | PA      | KK-ARKVPAKKAARLAP[ 9 ]  | 947  |
| <i>Mycobacterium avium complex</i>           | 909 | R      | GPAKR      | TA      | KKTSRKAPAKKAARKG-       | 932  |
| <i>Mycobacterium bovis</i>                   | 972 | R      | GPAKR      | PA      | RKAARKVPAKKAARKD-       | 995  |
| <i>Mycobacterium africanum</i>               | 911 | R      | GPAKR      | PA      | RKAARKVPAKKAARKD-       | 934  |
| <i>Mycobacterium canettii</i>                | 911 | R      | GPAKR      | PA      | RKAARKVPAKKAARKD-       | 934  |
| <i>Bifidobacterium bifidum</i> PRL2010       | 917 | A      | GPSKR      | --[ 2 ] | R---KTTGATAKKTAAK[ 34 ] | 972  |
| <i>Bifidobacterium longum</i> NCC2705        | 937 | A      | GPSTR      | --[ 2 ] | RGAGRAGGAKAVAGKKG[ 69 ] | 1030 |
| <i>Streptomyces coelicolor</i>               | 885 | K      | GPAKK[ 5 ] | VK      | KTAAKKAPAKKAAATKK[ 38 ] | 952  |
| <i>Corynebacterium glutamicum</i> ATCC 13032 | 943 | K[ 6 ] | APAKK      | TS[ 7 ] | KTTAKKTTAKKTVRKAP[ 16 ] | 996  |

**Figure S4. The C-terminal tail of the topoisomerase I from Actinobacteria is rich in basic amino acids.** Amino acid sequences of topoisomerase I from different Actinobacteria were aligned using Constraint-based multiple alignment tool, COBALT<sup>1</sup>. The regions of high conservation are highlighted. Mycobacterial topoisomerase I has a highly-conserved sequence (AKKAAAK) in the tail region.

## Reference

1. Papadopoulos J. S., Agarwala R. (2007) COBALT: constraint-based alignment tool for multiple protein sequences. *Bioinformatics* 23, 1073-1079. btm076 [pii].

A

RPOC\_MYCS2 (100%), 146,515.9 Da

DNA-directed RNA polymerase subunit beta' OS=Mycobacterium smegmatis (strain ATCC 700084 / mc(2)155) GN=rpoC PE=1 SV=1  
10 exclusive unique peptides, 10 exclusive unique spectra, 10 total spectra, 134/1317 amino acids (10% coverage)

|                     |                     |                       |                     |                       |                     |
|---------------------|---------------------|-----------------------|---------------------|-----------------------|---------------------|
| M L D V N F F D E L | R I G L A T A D D I | R N W S Y G E V K K   | P E T I N Y R T L K | P E K D G L F C E K   | I F G P T R D W E C |
| Y C G K Y K R V R F | K G I I C E R C G V | E V T R A K V R R E   | R M G H I E L A A P | V T H I W Y F K G V   | P S R L G Y L L D L |
| A P K D L E K I I Y | F A A Y V I T S V D | D E M R H N E L S T   | L E A E M A V E K K | A V E D Q R D A D L   | E A R A Q K L E A D |
| L A E L E A E G A K | S D V R R K V R D S | G E R E M R Q L R D   | R A Q R E L D R L D | E I W N T F T K L C E | P K Q L I V D E V L |
| Y R E L Q D R Y G E | Y F T G A M G A E S | I K K L I E N F D I   | D A E A E S L R E V | I R S G K G Q K K L   | R A L K R L K V V A |
| A F Q Q S G N S P M | G M V L D A V P V I | P P E L R P M V Q L   | D G G R F A T S D I | N D L Y R R V I N R   | N N R L K R L I D L |
| G A P E I I V N N E | K R M L Q E S V D A | L F D N G R R R G R P | V T G P G N R P L K | S L S D L L K G K Q   | G R F R Q N L L G K |
| R V D Y S G R S V I | V V G P Q L K L H Q | C G L P K K L M A L E | L F K P F V M K R L | V D L N H A Q N I K   | S A K R M V E R Q R |
| P Q V W D V L E E V | I A E H P V L L N R | A P T L H R L G I Q   | A F E P Q L V E G K | A I Q L H P L V C E   | A F N A D F D G D Q |
| M A V H L P L S A E | A Q A E A R I L M L | S S N N I L S P A S   | G K P L A M P R L D | M V T G L Y Y L T T   | L V E G A T G E Y Q |
| A A T K D A P E Q G | V Y S S P A E A I M | A M D R G A L S V R   | A K I K V R L T E L | R P P T D L E A Q L   | F E N G W K P G D A |
| W T A E T T L G R V | M F N E L L P K S Y | P F V N E Q M H K K   | V Q A R I I N D L A | E R F P M I V V A Q   | T V D K L K D A G F |
| Y W A T R S G V T V | S M A D V L V P F C | K Q E I L E R H E A   | E A D A I E R K Y Q | R G A L N H T E R N   | E S L V K I W Q D A |
| T E E V G K A L E E | F Y P A D N P I I T | I V K S G A T G N L   | T Q T R T L A G M K | G L V T N P K G E F   | I P R P I K S S F R |
| E G L T V L E Y F I | N T H G A R K G L A | D T A L R T A D S G   | Y L T R R L V D V S | Q D V I V R E H D C   | E T E R G I N V T L |
| A E R G P D G T L I | R D A H V E T S A F | A R T L A T D A V D   | A N G N V I I E R G | H D L G D P A I D A   | L L A A G I T T V K |
| V R S V L T C T S A | T G V C A M C Y G R | S M A T G K L V D I   | G E A V G I V A A Q | S I G E P G T Q L T   | M R T F H Q G G V T |
| G G A D I V G G L P | R V Q E L F E A R V | P R N K A P I A D V   | A G R V R L E E S D | K F F K I T I V P D   | D G G E E V V Y D K |
| L S K R Q R L R V I | T H E D G T E G V L | S D G D H V E V G D   | Q L M E G A A D P H | E V L R V Q G P R E   | V Q I H L V K E V Q |
| E V Y R A Q G V S I | H D K H I E V I V R | Q M L R R V T I I D   | S G S T E F L P G S | L T E R A E F E A E   | N R R V V A E G G E |
| P A A G R P V L M G | I T K A S L A T D S | W L S A A S F Q E T   | T R V L T D A A I N | C R S D K L N G L K   | E N V I I G K L I P |
| A G T G I S R Y R N | I Q V Q P T E E A R | A A A Y T I P S Y E   | D Q Y Y S P D F G Q | A T G A A V P L D D   | Y G Y S D Y R       |

B

RPOB\_MYCS2 (100%), 128,532.2 Da

DNA-directed RNA polymerase subunit beta OS=Mycobacterium smegmatis (strain ATCC 700084 / mc(2)155) GN=rpoB PE=1 SV=1  
41 exclusive unique peptides, 54 exclusive unique spectra, 58 total spectra, 529/1169 amino acids (45% coverage)

|                     |                       |                     |                     |                     |                     |
|---------------------|-----------------------|---------------------|---------------------|---------------------|---------------------|
| M L E G C I L A V S | S Q S K S N A I T N   | N S V P G A P N R V | S F A K L R E P L E | V P G L L D V Q T D | S F E W L V G S D R |
| W R Q A A I D R G E | E N P V G G L E E V   | L A E L S P I E D F | S G S M S L S F S D | P R F D E V K A S V | D E C K D K D M T Y |
| A A P L F V T A E F | I N N N T G E I K S   | Q T V F M G D F P M | M T E K G T F I I N | G T E R V V V S Q L | V R S P G V Y F D E |
| T I D K S T E K T L | H S V K V I P G R G   | A W L E F D V D K R | D T V G V R I D R K | R R Q P V T V L L K | A L G W T N E Q I V |
| E R F G F S E I M M | G T L E K D T T S G   | T D E A L L D I Y R | K L R P G E P P T K | E S A Q T L L E N L | F F K E K R Y D L A |
| R V G R Y K V N K K | L G L N A G K P I T   | S S T L T E E D V V | A T I E Y L V R L H | E G Q T S M T V P G | G V E V P V E V D D |
| I D H F G N R R L R | T V G E L I Q N Q I   | R V G L S R M E R V | V R E R M T T Q D V | E A I T P Q T L I N | I R P V V A A I K E |
| F F G T S Q L S Q F | M D Q N N P L S G L   | T H K R R L S A L G | P G G L S R E R A G | L E V R D V H P S H | Y G R M C P I E T P |
| E G P N I G L I G S | L S V Y A R V N P F   | G F I E T P Y R K V | E N G V V T D Q I D | Y L T A D E E D R H | V V A Q A N S P T D |
| E N G R F T E D R V | M V R K K G G E V E   | F V S A D Q V D Y M | D V S P R Q M V S V | A T A M I P F L E H | D D A N R A L M G A |
| N M Q R Q A V P L V | R S E A P L V G T G   | M E L R A A I D A G | D V V V A D K T G V | I E E V S A D Y I T | V M A D D G T R Q S |
| Y R L R K F A R S N | H G T C A N Q R P I   | V D A G Q R V E A G | Q V I A D G P C T Q | N G E M A L G K N L | L V A I M P W E G H |
| N Y E D A I I L S N | R L V E E D V L T S   | I H I E E H E I D A | R D T K L G A E E I | T R D I P N V S D E | V L A D L D E R G I |
| V R I G A E V R D G | D I L L V G K V T P K | G E T E L T P E E R | L L R A I F G E K A | R E V R D T S L K V | P H G E S G K V I G |
| I R V F S R E D D D | E L P A G V N E L V   | R V Y V A Q K R K I | S D G K L A G R H   | G N K G V I G K I L | P V E D M P F L P D |
| G T P V D I I L N T | H G V P R R M N I G   | Q I L E T H L G W V | A K A G W N I D V A | A G V P D W A S K L | P E E L Y S A P A D |
| S T V A T P V F D G | A Q E G E L A G L L   | G S T L P N R D G E | V M V D A D G K S T | L F D G R S G E P F | P Y P V T V G Y M Y |
| I L K L H H L V D D | K I H A R S T G P Y   | S M I T Q Q P L G G | K A Q F G G Q R F G | E M E C W A M Q A Y | G A A Y T L Q E L L |
| T I K S D D T V G R | V K V Y E A I V K G   | E N I P E P G I P E | S F K V L L K E L Q | S L C L N V E V L S | S D G A A I E M R D |
| G D D E D L E R A A | A N L G I N L S R N   | E S A S V E D L A   |                     |                     |                     |

Figure S5. Unique peptides of *M. smegmatis* RNAP subunits identified by mass spectrometry of the eluates from the Co-IP assay (A) RNAP beta' subunit (B) RNAP beta subunit.

**Table S1. PCR primers for Gibson cloning**

| <b>Primer</b>                  | <b>Gene</b>      | <b>Sequence (5'-3')</b>                                   |
|--------------------------------|------------------|-----------------------------------------------------------|
| RNA Polymerase<br>beta_LIC_FP  | rpoB             | CTGTACTTCCAATCCAATGTGCT<br>GGAAGGATGCA                    |
| RNA Polymerase<br>beta_LIC_RP  | rpoB             | ATCCGTTATCCACTTCCAATCTAC<br>GCGAGATCCTCGAC                |
| RNA Polymerase<br>beta'_LIC_FP | rpoC             | CTGTACTTCCAATCCAATGTGCT<br>AGACGTCAACTTC                  |
| RNA Polymerase<br>beta'_LIC_RP | rpoC             | CGTTATCCACTTCCAATTTAGCGG<br>TAATCCGAGTAG                  |
| MsmTopoI_pKW08_FP              | MsmtopA          | TTCGCGGATCCTTGGCTGGCGG<br>CGACCGCGG                       |
| MsmTopoI_pKW08_RP              | MsmtopA          | TTCTCAAGCTTCTAGGCCTTC<br>TTGGCGGCGG                       |
| MsmTopoI_2OT_FP                | MsmtopA          | GGGATCGAGGAAAACCTGTACT<br>TCCAAATGGCTGGCGGCGACCG          |
| MsmTopoI_2OT_RP                | MsmtopA          | GCGGATCCGTTATCCACTTCCAATATT<br>GTTCGGCGGAAAACCTAGGCCTTCTT |
| D1-D8_MsmTopoI_2OT_FP          | D1-D8<br>MsmtopA | GGGATCGAGGAAAACCTGTACTTCCA<br>AATGGCTGGCGGCGACCG          |
| D1-D8_MsmTopoI_2OT_RP          | D1-D8<br>MsmtopA | GCGGATCCGTTATCCACTTCCAATATT<br>GTTAGGCACGGCGGTTCGG        |

**Table S2. Primers used for Site-Directed Mutagenesis**

| <b>Primer</b>         | <b>Sequence (5'-3')</b>                 | <b>Description</b>                                                                                                      |
|-----------------------|-----------------------------------------|-------------------------------------------------------------------------------------------------------------------------|
| CTD-MsmTopoI_pKW08_FP | GGATCCTGTCAGGATTCC<br>ACGATGAGAG        | Deletion of the N-terminal domains from the full-length <i>topA</i> gene that was previously cloned into pKW08.         |
| CTD-MsmTopoI_pKW08_RP | GGCGTCGAGGGTTCGATC<br>GCG               |                                                                                                                         |
| NTD-MsmTopoI_2OT_FP   | TAGAACCTCGAAGGCATC<br>GACGC             | Insertion of a stop codon in the <i>topA</i> gene for early termination at the end of the N-terminus domains (D1-D4).   |
| NTD-MsmTopoI_2OT_RP   | GCCGCCGACGAGCTGCTT                      |                                                                                                                         |
| D1-D5_MsmTopoI_2OT_FP | GCGTCCCTCTTGCTATGT<br>GGCGAAGAGCTTTTCGG | Pro702 of MsmTopoI was substituted with a stop codon. The resulting protein (1-701) is termed as MsmTopoI-701t (D1-D5). |
| D1-D5_MsmTopoI_2OT_RP | CCGAAAAGCTCTTCGCCA<br>CATAGCAAGAGGGACGC |                                                                                                                         |
| D1-D6_MsmTopoI_2OT_FP | GCCCACGACGCGCTACAG<br>CGACAGCAGC        | Pro786 of MsmTopoI was substituted with a stop codon. The resulting protein (1-785) is termed as MsmTopoI-785t (D1-D6). |
| D1-D6_MsmTopoI_2OT_RP | GCTGCTGTCGCTGTAGCG<br>CGTCGTGGGC        |                                                                                                                         |
| D1-D7_MsmTopoI_2OT_FP | CGGCCACGGCGTTTCTAC<br>TCGGCGTAGATCTT    | Pro840 of MsmTopoI was substituted with a stop codon. The resulting protein (1-839) is termed as MsmTopoI-839t (D1-D7). |
| D1-D7_MsmTopoI_2OT_RP | AAGATCTACGCCGAGTAG<br>AAACGCCGTGGCCG    |                                                                                                                         |
